# Supplementary material for: A cis-encoded sRNA, Hfq and mRNA secondary structure act independently to suppress IS200 transposition
Source: PubMed Central journal article supplement — Nucleic Acids Res. 2015 Jun 4;43(13):6511–27. doi: 10.1093/nar/gkv584 (PMC4513863; doi:10.1093/nar/gkv584), 2015-06-04
Supplement: supp_gkv584_nar-01235-y-2015-File012.pdf [file supp_gkv584_nar-01235-y-2015-File012.pdf]

## **SUPPORTING MATERIAL**

### **A *cis*-encoded sRNA, Hfq, and mRNA secondary structure act independently to suppress IS200 transposition**

Michael J. Ellis<sup>1</sup>, Ryan S. Trussler<sup>1</sup> and David B. Haniford<sup>1#</sup>

<sup>1</sup>Department of Biochemistry, University of Western Ontario, London, ON, N6A 5C1, Canada,

<sup>#</sup>Corresponding author: Email [haniford@uwo.ca](mailto:haniford@uwo.ca); Tel (+1) 519-661-4013; Fax (+1) 519-661-3175

The authors wish it to be known that, in their opinion, the first two authors should be regarded as joint First Authors.

#### **THIS FILE INCLUDES**

**Supplementary Figures S1 to S8**

**Supplementary Materials and Methods**

**Tables S1 and S2**

**Supplementary References**

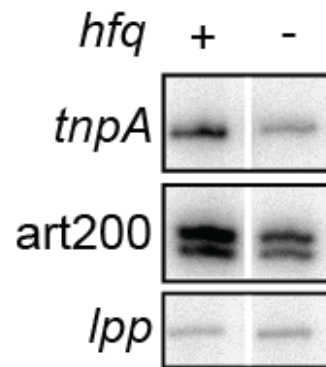

**Figure S1. Impact of Hfq on *tnpA-lacZ* transcript levels.** RNA isolated from isogenic *hfq*<sup>+/hfq</sup><sup>-</sup> strains was analyzed by primer extension. To facilitate detection of the *tnpA-lacZ* transcript the fusion was expressed from the P<sub>BAD</sub> promoter. As *tnpA* levels did not increase in *hfq*<sup>-</sup> versus *hfq*<sup>+</sup> we conclude that increased *tnpA* expression in *hfq*<sup>-</sup> is not due to an increase in steady-state transcript levels.



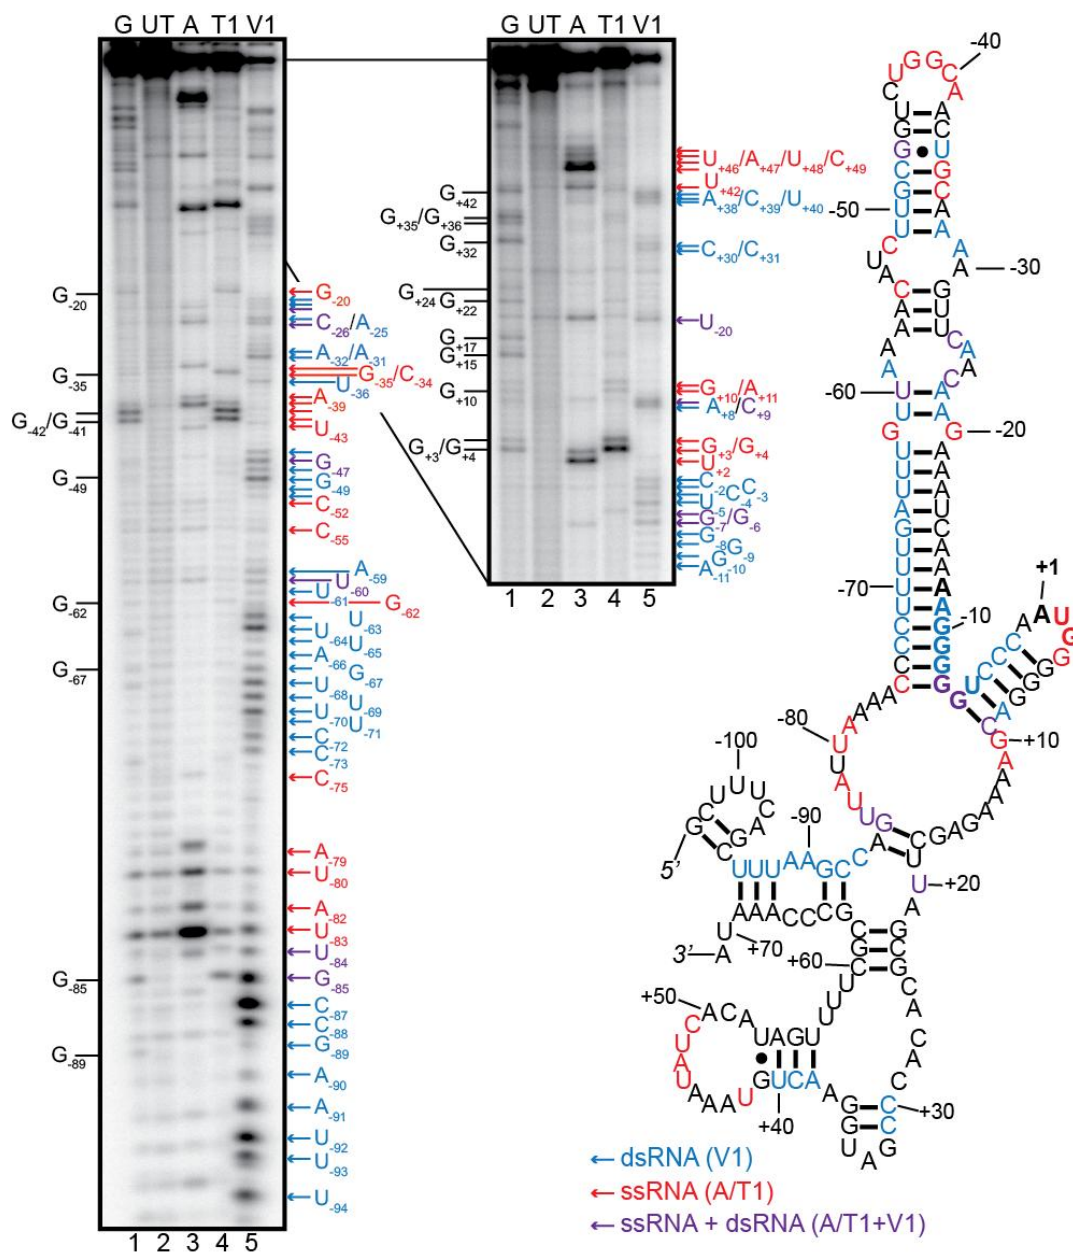

**Figure S3. RNase structure probing of *tnpA*<sub>1-173</sub>.** 5'<sup>32</sup>P-labeled *tnpA*<sub>1-173</sub> was subject to limited cleavage by RNase A, T1, or V1 for 15 min at ambient temperature. Samples were resolved on a 10% denaturing polyacrylamide gel. An RNase T1 sequencing lane (lane 1) and untreated RNA (lane 2) are shown. Each position was assessed for reactivity to dsRNA specific RNase (V1; blue) or ssRNA specific RNase (A/T1; red). Positions sensitive to both types of RNase are highlighted in purple. Positions that were highly sensitive to only one type of RNase were used as hard constraints in mFold (1) to produce the secondary structure shown on the right. The reactivity of each nucleotide is shown on the secondary structure by coloured letters. All nucleotide numbering is relative to the *tnpA* translational start codon. The Shine-Dalgarno sequence and translational start codon are indicated in bold.

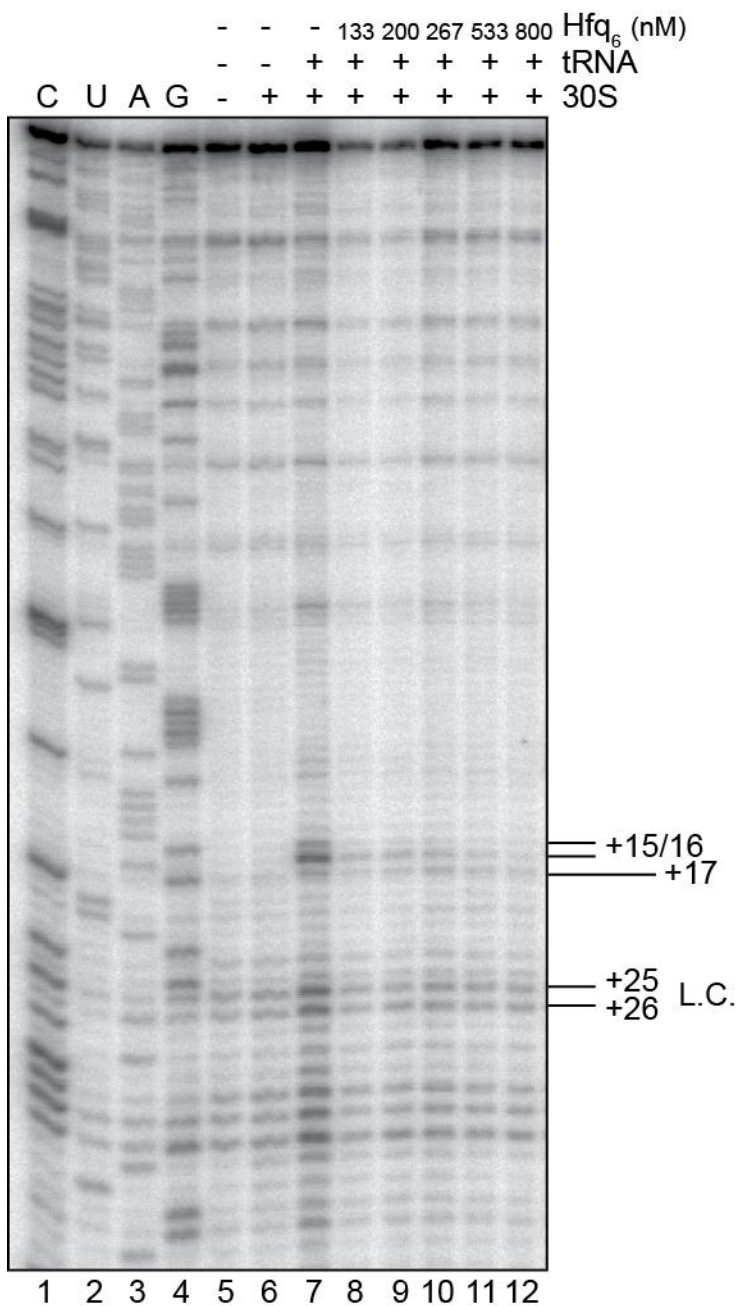

**Figure S4. Hfq blocks ribosome binding to *tnpA* *in vitro*.** The impact of Hfq on ribosome binding to *tnpA*<sub>1-173</sub> was measured by a toeprinting assay (see also Figure 8A and B, ‘experiment B’). The combined toeprint signal (G<sub>+15</sub>, A<sub>+16</sub>, and G<sub>+17</sub>) was normalized to positions +25 and +26 which served as loading controls. For example, lane 7 has 5-fold more signal at +25/+26 than the average signal for lanes 8, 9, 11, and 12. Note that these positions are 3’ to the ribosome-*tnpA* interaction and therefore primer extension to this point should be insensitive to ribosome binding.

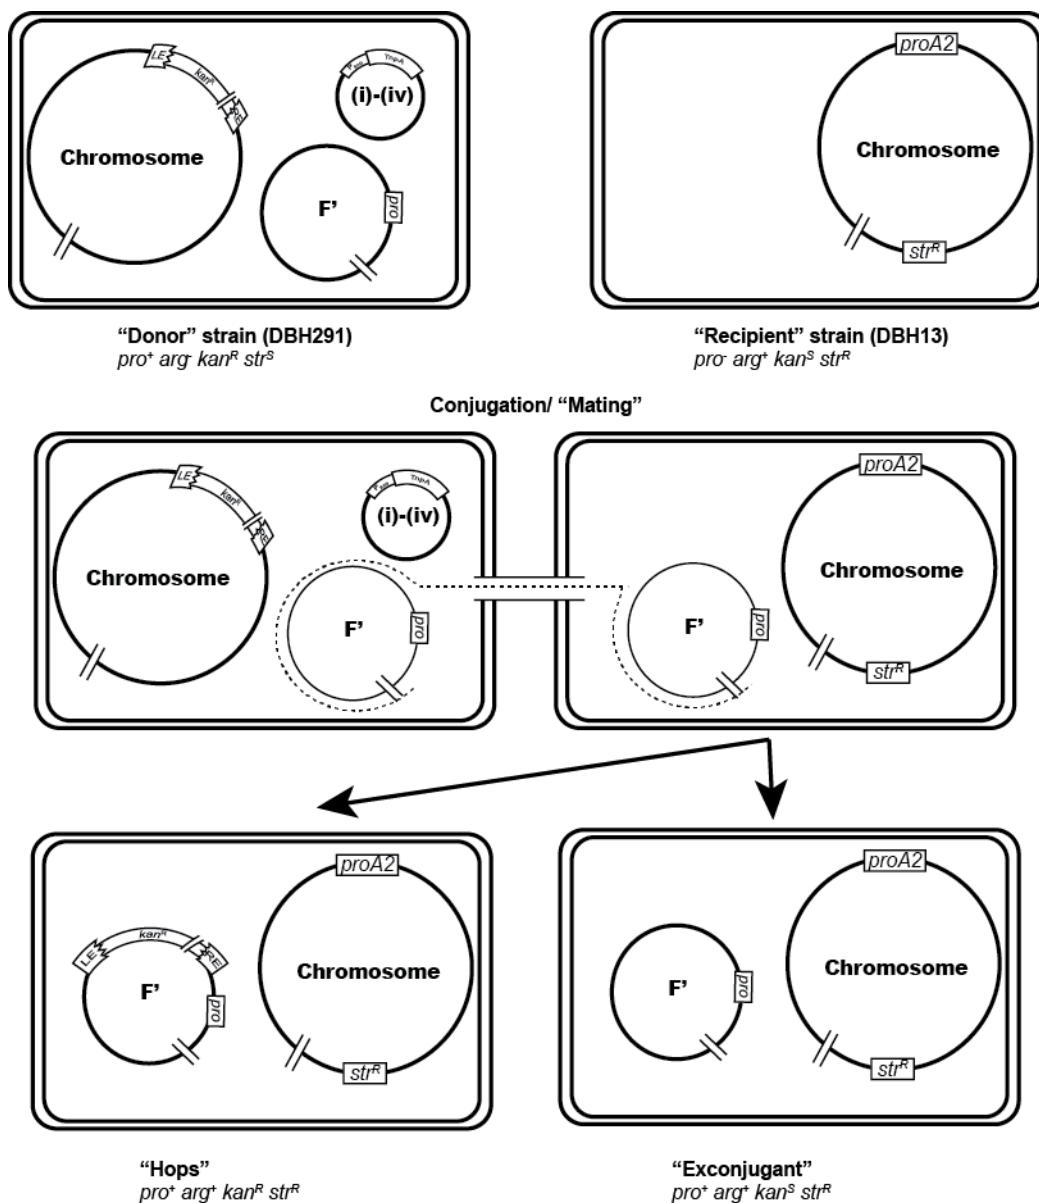

**Figure S5. Schematic of conjugal "mating out" assay for IS200 transposition.** DBH291 ("donor strain") contains the Mini IS200-kan element integrated in the chromosome as well as an F' episome marked with *lac-pro*. DBH291 is transformed with a plasmid expressing TnpA under control of the P<sub>BAD</sub> promoter and various regulatory elements (constructs *i-iv*, see Figure 9). TnpA expressed from this plasmid can then catalyze transposition of Mini IS200-kan in *trans*. The donor strain is mated with DBH13 (recipient strain) which is *str<sup>R</sup>* and *pro<sup>-</sup>*. Following mating, cells are plated on M9 media containing streptomycin but not proline (to select for DBH13 cells which have acquired the F', "exconjugates"), or streptomycin and kanamycin (to select for cells containing the F' with IS200-kan, "hops"). The number of "exconjugates" indicates the mating efficiency and the ratio of "hops" to "exconjugates" is the relative transposition frequency. Note that this assay only measures transposition from the chromosome onto the F' episome.

**A**

```

AGCCATCGCCGCTGGCGTTTTTATTGACGGAGACATACCCATGACAACAC Target Site - yafX
AGCCATCGCCGCTGGCGTTTTTATTGTCCTATGGAAAACCCCGAGCTAGGC yafX-IS200LE
CCGGCTATGCCGGAGGATATTTATTGACGGAGACATACCCATGACAACAC IS200RE-yafX

CCTTTGAATTCAAAGGAGGTTTTTTCTTATTTTCATACCAATAAACCCCTT Target Site - ybaA
CCTTTGAATTCAAAGGAGGTTTTTTGTCCTATGGAAAACCCCGAGCTAGGC ybaA-IS200LE
CCGGCTATGCCGGAGGATATTTATTCTTATTTTCATACCAATAAACCCCTT IS200RE-ybaA

```

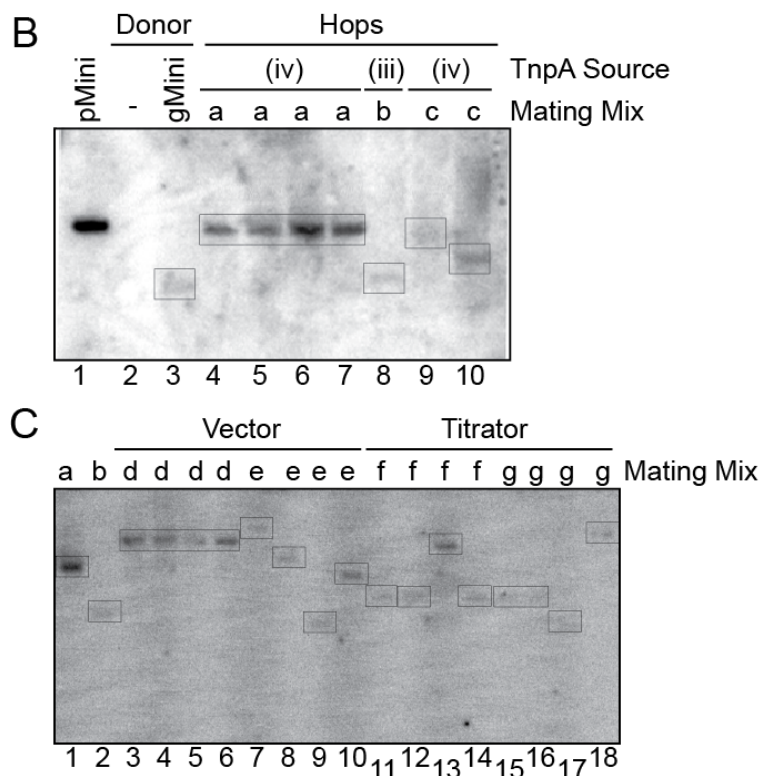

**Figure S6. Validation of IS200 transposition events ('hops').** (A) The location of the IS200-kan insertion site from two 'hop' colonies (construct *i*; Fig. 9A) was determined by ST-PCR (see Supplementary Materials and Methods). The sequence of the two insertion sites (*yafX* and *ybaA*) is shown in black and the 'left-end' (LE) and 'right-end' (RE) sequence from IS200 is shown in red and blue, respectively. (B) IS200 transposition events (construct *iii* and *iv*; Fig. 9A) were detected by Southern blot analysis (using a kan<sup>R</sup> probe) of genomic DNA that had been subject to restriction enzyme digestion (see Supplementary Materials and Methods). *a-c* refers to different mating mixes that gave rise to hop colonies. The fragment in lane 3 defines the starting location of IS200-kan in the chromosome of the donor strain. The appearance of fragments of different size in hop colony genomic preparations was taken as confirmation that transposition had occurred. Additionally, the observation that all 4 hop colonies from mating mix *a* produced a fragment of (apparently) the same size was taken as evidence that these are not independent transposition events. pMini contained genomic DNA from the donor strain harbouring IS200-kan on a plasmid (pDH881) and lane 2 contained genomic DNA isolated from the donor strain not containing IS200-kan. (C) Southern blot analysis of hop colonies from the indicated mating mixes (*d-g*) described in Figure 9C. *a* and *b* contain genomic DNA from hop colonies derived from mating mixes described in part B.

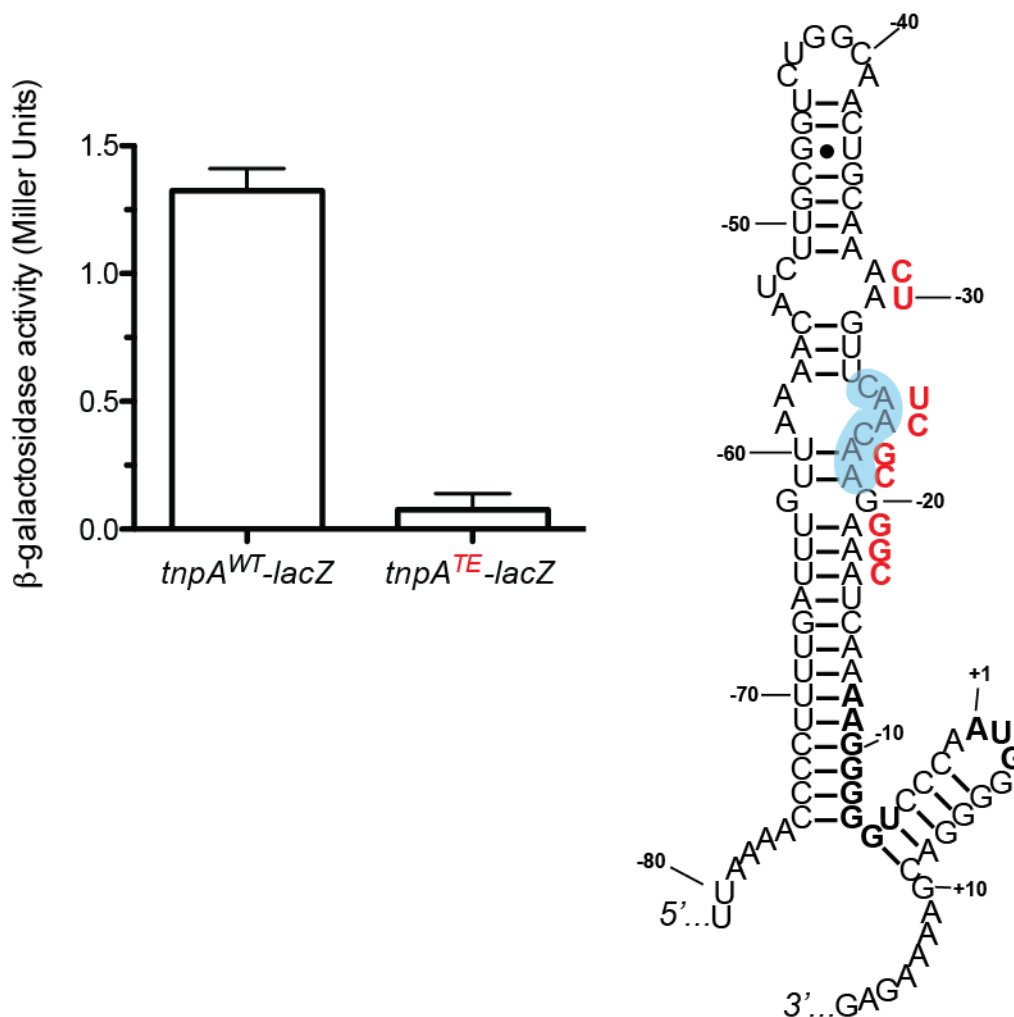

**Figure S7. Impact of mutations to a putative translational enhancer in *tnpA* on *tnpA* expression.** Mutations to C/A rich region (mutations in red, C/A rich region highlighted in blue) and the surrounding sequence were introduced into an otherwise wild-type *tnpA-lacZ* TLF (pDH861).  $\beta$ -galactosidase activity was measured by the Miller Assay from three independent clones and error bars show standard error on the mean.



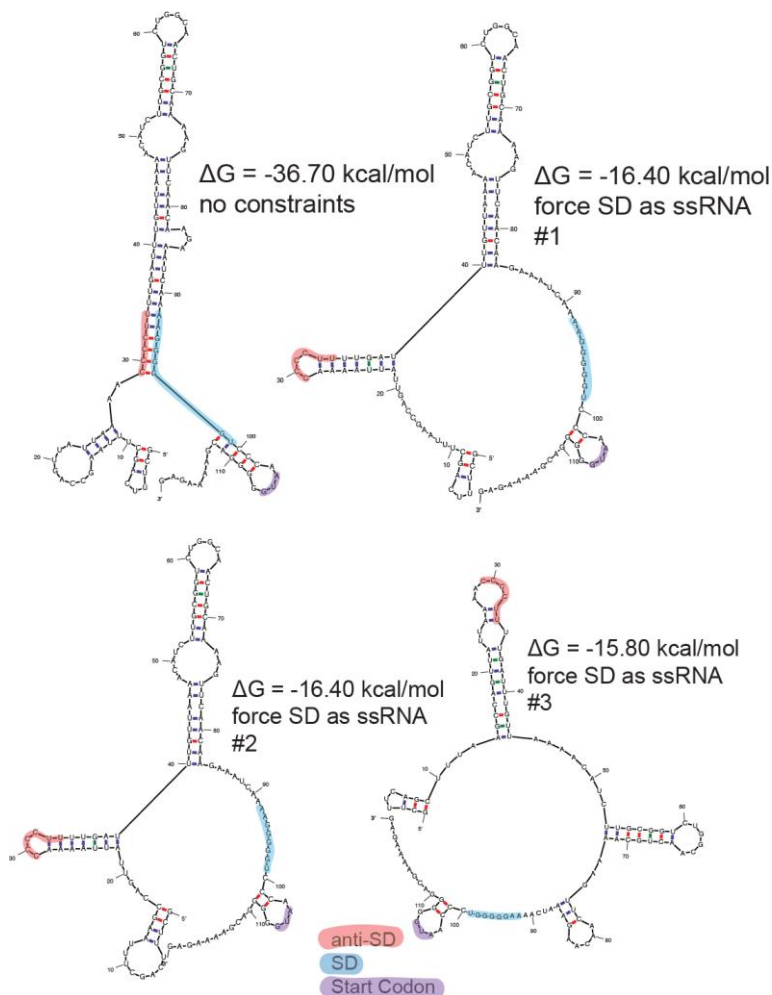

**Figure S8. Predicted alternative secondary structures of the first 120-nt of *tnpA*.** mFold was used to predict secondary structures of the 5' end of *tnpA* with a 50-nt folding window and no other structural constraints (top left) or with the Shine-Dalgarno (SD) sequence forced to be single-stranded. The folding energies of the unconstrained and top three alternative structures are shown. The Shine-Dalgarno (SD, blue) and complementary sequence (anti-SD, red) are highlighted in each structure along with the translational start codon (purple).

## Supplementary Materials and Methods

### *Strain and plasmid construction*

Supplemental plasmids and phage are listed in Table S1. The entire IS200 element (*tnpA*<sub>6</sub>, *STM4311*) was amplified from *Salmonella* Typhimurium LT2 genomic DNA using GoTaq (Promega) and primers oDH378 and oDH379; the amplicon was cloned into pGem-T Easy (Promega) to produce pDH882 which served as the IS200 template for all further plasmid construction.

The WT IS200-*lacZ* translational fusion (TLF) was made by first amplifying IS200 from pDH882 with primers oDH130 and oDH535 and then cloning the amplicon into the NcoI/PstI sites of pGEM-T easy; the *lacZ* gene was amplified with primers oDH534 and oDH536 and cloned into the PstI site to produce pDH861 which contains the first 323-nt of IS200 fused in frame to codon 10 of *lacZ*. All mutations were introduced into pDH861 (or pDH880 for pDH918) using overlap PCR with primers oDH130 and oDH431 and the relevant mutagenic primers; pA1 (oDH414, oDH415), pA2 (oDH410, oDH411), pA3 (oDH467, oDH468), pA4 (oDH469, oDH470), pA5 (oDH471, oDH472), pA6 (oDH473, oDH474), LS (oDH416, oDH417) and M1 (oDH538, oDH539). PCR products were digested with EcoRI and cloned into the same sites in pDH861 resulting in pDH827, pDH863, pDH877, pDH878, pDH879, pDH880, pDH862, and pDH916, respectively.

To make the titrator plasmids, the *sgrS* terminator (amplified from DBH323 genomic DNA with oDH439 and oDH440) was cloned into the IS200 EcoRI site of a pDH880 partial digest. Next, a PCR amplicon containing bp 45-298 of IS200 and the *sgrS* terminator was made using Q5 polymerase (NEB) and primers oDH440 and either oDH531 (contains P<sub>Tet</sub>) or oDH530 (contains T7 P<sub>A1</sub>). The M1 mutation was introduced using overlap PCR with primers oDH440, oDH538, oDH539, and oDH531. PCR products were cloned into XmnI/ScaI digested pACYC184 resulting in plasmids pDH899 (low-copy titrator), pDH898 (high-copy titrator), and pDH914 (low-copy M1 titrator).

The *trans*-art200 plasmids were made by cloning the EcoRI/XmnI fragment of pDH882 (WT) or pDH916 (M1) into the same sites of pACYC184 to produce pDH902 and pDH914.

For mating out experiments, DBH33 was lysogenized with λDBH881 to create DBH291 (DBH33 Mini IS200-*kan*) (as described in (2,3)). First, pDH882 (pGEM-IS200) was digested with EcoRV, treated with Bal31 and ligated to *kan*<sup>R</sup> to make pDH855. Mini IS200-*kan* was then cloned into Sall/SphI digested pACYC184 to make pDH856. Next, Mini IS200-*kan* was PCR amplified with primers oDH434 and oDH435 and the amplicon was digested with BamHI and cloned into BclI digested pNK81 to make pDH881. Finally, pDH881 was crossed onto λNK1039 (4) to make λDBH881.

Transposase expression in mating out experiments was from pBAD24 derivatives (5). pDH857 was made by amplifying the *tnpA* ORF from pDH855 with primers oDH451 and oDH452 and cloning the NcoI digested amplicon into the same site of pBAD24. The Y125F mutation was introduced into pDH857 using overlap PCR with primers oDH420, oDH421, oDH451, and oDH452 to make pDH860. Plasmids expressing TnpA under control of the WT (pDH896) or LS (pDH897) IS200 5'UTR were made by replacing the EcoRI/SphI fragment of pDH815 (WT) or pDH835 (LS) with the same fragment from pDH857. pDH815 and pDH835 consist of nts 45-323 of IS200 (WT or LS) fused in frame to codon 10 of *lacZ* and cloned into the NcoI/PstI sites of pBAD24. IS200 was amplified from pDH882 with primers oDH532 and oDH535 and cloned into the NcoI/PstI sites of pBAD24 and codon 10 of the *lacZ* gene (amplified with primers oDH534 and oDH536) was cloned into the PstI site of this plasmid. Finally, the pBAD24 Shine-Dalgarno sequence (SD<sub>BAD24</sub>) was mutated from AGGAGG to ACCACC to produce pDH815. The LS mutation was introduced to pDH815 by overlap PCR (primers oDH532, oDH431, oDH416, and oDH417) to produce pDH835.

*ST-PCR*

Semi-random, two-step PCR (ST-PCR) was used as previously described to map putative IS200 insertion sites (3,6). Briefly, genomic DNA from ‘hop’ colonies was amplified with a semi-random primer (oDH167) and a kan-specific primer (oDH388). PCR products were cloned into pGEM-T easy and sequenced, and then mapped to the *E. coli* MG1655 genome to identify insertion sites. Insertion site specific primers were then designed to flank the insertion site (oDH457, oDH458, oDH461, and oDH462) which was then amplified, cloned as above, and sequenced. The precise junction between each end of IS200 and the insertion site was then determined.

*Southern blot*

Genomic DNA was purified from ‘hop’ colonies (Sm<sup>R</sup>Kan<sup>R</sup>) using a Gen Elute Bacterial Genomic DNA kit (Sigma-Aldrich). DNA was digested with XmnI which cuts once in IS200 and then resolved on a 1% agarose gel. Southern blot for the kan<sup>R</sup> gene was performed as previously described (3) with a <sup>32</sup>P-labeled riboprobe.

**Table S1. Bacteriophage and plasmids for Supporting Material**

| Name            | Relevant genotype                                                               | Use/ Notes                                                                        |
|-----------------|---------------------------------------------------------------------------------|-----------------------------------------------------------------------------------|
| <u>λ Phage</u>  |                                                                                 |                                                                                   |
| λNK1039         | Encodes <i>his</i> operon                                                       | Plasmid-λ crosses (4)                                                             |
| λDBH881         | λNK1039 with Mini IS200-kan                                                     | Product of recombination between pDH881 and λNK1039; used for DBH291 construction |
| <u>Plasmids</u> |                                                                                 |                                                                                   |
| pNK81           | pBR333 derivative, encodes <i>his</i> operon; Ap <sup>R</sup>                   | λ crosses (7)                                                                     |
| pDH815          | pBAD24- <i>tnpA-lacZ</i> TLF; Ap <sup>R</sup>                                   | Arabinose inducible TLF                                                           |
| pDH827          | pDH815 with pA1 mutation; Ap <sup>R</sup>                                       | Mutations to P <sub>art200</sub> -10 region                                       |
| pDH832          | pDH815 with pA2 mutation; Ap <sup>R</sup>                                       | Mutations to P <sub>art200</sub> -10 region                                       |
| pDH835          | pDH815 with LS mutation; Ap <sup>R</sup>                                        | Constructing pDH897                                                               |
| pDH855          | pGEM-T easy with Mini IS200-kan; Kan <sup>R</sup> Ap <sup>R</sup>               | Constructing DBH291                                                               |
| pDH856          | pACYC184 with Mini IS200-kan; Kan <sup>R</sup> Cm <sup>R</sup> Tet <sup>S</sup> | Constructing DBH291                                                               |
| pDH863          | pDH861 with pA2 mutations; Ap <sup>R</sup>                                      | Mutations to P <sub>art200</sub> -10 region                                       |
| pDH877          | pDH861 with pA3 mutation; Ap <sup>R</sup>                                       | Mutations to P <sub>art200</sub> -10 region                                       |
| pDH878          | pDH861 with pA4 mutation; Ap <sup>R</sup>                                       | Mutations to P <sub>art200</sub> -10 region                                       |
| pDH879          | pDH861 with pA5 mutation; Ap <sup>R</sup>                                       | Mutations to P <sub>art200</sub> -35 region                                       |
| pDH881          | pNK81 with Mini IS200-kan; ; Kan <sup>R</sup> Ap <sup>R</sup>                   | Crossing Mini IS200-kan onto λNK1039                                              |
| pDH882          | IS200 cloned into pGem-T easy; Ap <sup>R</sup>                                  | Source of IS200 sequence                                                          |

**Table S2. Oligonucleotides used in this study**

| Name   | Sequence (5' to 3')                           | Use                                                                                                                     |
|--------|-----------------------------------------------|-------------------------------------------------------------------------------------------------------------------------|
| oDH130 | GAATTGTAATACGACTCACTATAG                      | TLF construction                                                                                                        |
| oDH167 | GGCCACGCGTCGACTAGTACNNNNNNNNNGATAT            | ST-PCR - random primer                                                                                                  |
| oDH378 | TTTGTGGTGTAGCGTAACGGTAATTG                    | IS200 amplification from LT2                                                                                            |
| oDH379 | GGCATTTCGGTAAGTGTGATGAAG                      |                                                                                                                         |
| oDH388 | ACGCCATATGGCCAGTGTTACAACCAATTAACCAA<br>TTCTGA | ST-PCR - Kan specific                                                                                                   |
| oDH390 | CAGCTGGTCAACTTTAGCGTTTCAGAG                   | <i>lpp</i> primer extension                                                                                             |
| oDH394 | TATTTGGGCGCGAAAACATATG                        | <i>tnpA</i> primer extension                                                                                            |
| oDH397 | GCTGCCTACTGCCTACGCTTCTC                       | Sequencing IS200 plasmids                                                                                               |
| oDH410 | GGGGGACGAGGGGGGCTTGGCG                        | pDH863 construction                                                                                                     |
| oDH411 | CGCCAAGCCCCCTCGTCCCCC                         |                                                                                                                         |
| oDH414 | GGGGGACGACCCGAGCTTAGCG                        | pDH827 construction                                                                                                     |
| oDH415 | CGCTAAGCTCGGGTTCGTCCCCC                       |                                                                                                                         |
| oDH416 | CCAGTTATTTAAAAGGGGAAATGATTTGTTAAAAC           | pDH862 construction                                                                                                     |
| oDH417 | GTTTTAACAAATCATTTCCTTTTAATAACTGG              |                                                                                                                         |
| oDH420 | GATACAGGACTTCATAAAGCAC                        | pDH860 construction                                                                                                     |
| oDH421 | GTGCTTTATGAAGTCCTGTATC                        | pDH860 construction                                                                                                     |
| oDH427 | CATCTTGCGGTCTGGCAAC                           | art200 primer extension                                                                                                 |
| oDH428 | GTTGCCAGACCGCAAGATG                           | <i>tnpA</i> primer extension                                                                                            |
| oDH431 | AGGCTGCGCAACTGTTGGG                           | TLF construction                                                                                                        |
| oDH434 | GCGGGATCCGCGCTTTTTTTGTCTATGG                  | BamHI IS200-LE                                                                                                          |
| oDH435 | GAGGGATCCAATTTATAAAATAAATATCCTC               | BamHI IS200-RE                                                                                                          |
| oDH439 | TGCTCGGAATTCCTGAAAGTTGACTT                    | titrator construction                                                                                                   |
| oDH440 | TAGCCAGAATTCCTAACCAGTAAGGC                    |                                                                                                                         |
| oDH450 | TAATACGACTCACTATAGGCTTTCAGCTTTAAGCC<br>AG     | Fwd primer for <i>tnpA</i> <sub>1-173</sub> <i>in vitro</i><br>transcription template, contains<br>T7 promoter sequence |
| oDH451 | ATACCATGGGGGACGAAAAGAGCTTAGC                  | pDH857 construction                                                                                                     |
| oDH452 | ATACCATGGAAC TTCGTTACTTACGGCC                 | pDH857 construction                                                                                                     |
| oDH453 | ACCGTTATTCATTCGTGATTGCG                       | Southern Probe template (Kan<br>rev)                                                                                    |
| oDH454 | TAATACGACTCACTATAGGGAGCGTTGCCAATGAT<br>GTTACA | Southern Probe template (T7-<br>Kan)                                                                                    |
| oDH457 | ATCACATTTAACATTAAGAACAGG                      | IS200 Hop verification ( <i>ybaA</i> )                                                                                  |
| oDH458 | TCAGCGAAGATTATAATTTTCG                        | IS200 Hop verification ( <i>ybaA</i> )                                                                                  |
| oDH461 | TGCGTCTGTGTTGTTCATGG                          | IS200 Hop verification ( <i>yafX</i> )                                                                                  |
| oDH462 | AGGCATCCGTACAGACACGG                          | IS200 Hop verification ( <i>yafX</i> )                                                                                  |
| oDH467 | GGGGGACGAACGCGGCTTAGCG                        | pDH877 construction                                                                                                     |
| oDH468 | CGCTAAGCCGCGTTCGTCCCCC                        |                                                                                                                         |
| oDH469 | GGGGGACGCGCCGCGGCTTAGCG                       | pDH878 construction                                                                                                     |
| oDH470 | CGCTAAGCCGCGCCGTCCCCC                         |                                                                                                                         |
| oDH471 | GCACACCCGAGCGCGGTGTAAATATC                    | pDH879 construction                                                                                                     |
| oDH472 | GATATTTACACCGCGCTCGGGTGTGC                    |                                                                                                                         |
| oDH473 | CCGATGGAACCGCGGCTATCACATAG                    | pDH880 construction                                                                                                     |

---

|        |                                                                                    |                                                                                             |
|--------|------------------------------------------------------------------------------------|---------------------------------------------------------------------------------------------|
| oDH474 | CTATGTGATAGCCGCGGTTCCATCGG                                                         |                                                                                             |
| oDH500 | TAATACGACTATAGGTCCCCCATTGGGACC                                                     | Fwd primer for art200 <i>in vitro</i> transcription template, contains T7 promoter sequence |
| oDH501 | AACCCCTTTTGATTTGTTAAAC                                                             | Rev primer for art200 <i>in vitro</i> transcription template                                |
| oDH530 | TTATCAAAAAGAGTATTGACTTAAAGTCTAACCTA<br>TAGGATACTTACAGCCTCAGCTTTAAGCCAGTTAT<br>TAAA | pDH898 construction                                                                         |
| oDH531 | AAGAATTCTCATGTTTGACAGCTTATCATCGATAA<br>GCTTTAATGCGGTAGTCAGCTTTAAGCCAGTTATT<br>AAA  | pDH899 construction                                                                         |
| oDH532 | CACCATGGTCAGCTTTAAGCCAGTTA                                                         |                                                                                             |
| oDH534 | GCCTGCAGGTCGTTTTACAACGTCGTGAC                                                      | pDH861 construction                                                                         |
| oDH535 | GTCTGCAGATCTGCACAACATTCTGC                                                         |                                                                                             |
| oDH536 | GCCTGCAGAGATTATTTTTGACACCAGA                                                       |                                                                                             |
| oDH537 | TGATTTGTTAAAACATCTTGCGG                                                            | art200 primer extension                                                                     |
| oDH538 | GTTAAAACATCTTGCGGTCTCCGAACTGCAAAAGT<br>TCAAC                                       | Mutagenic primers for “M1” mutation                                                         |
| oDH539 | GTTGAACTTTTGACAGTTCGGAGACCGCAAGATGTT<br>TTAAC                                      |                                                                                             |

---

## Supplementary References

1. Zuker, M. (2003) Mfold web server for nucleic acid folding and hybridization prediction. *Nucleic Acids Research*, **31**, 3406-3415.
2. Ellis, M.J., Trussler, R.S. and Haniford, D.B. (2015) Hfq binds directly to the ribosome binding site of IS10 transposase mRNA to inhibit translation. *Molecular Microbiology*, n/a-n/a.
3. Ross, J.A., Trussler, R.S., Black, M.D., McLellan, C.R. and Haniford, D.B. (2014) Tn5 transposition in *Escherichia coli* is repressed by Hfq and activated by over-expression of the small non-coding RNA SgrS. *Mobile DNA*, **5**, 27.
4. Haniford, D.B., Chelouche, A.R. and Kleckner, N. (1989) A specific class of IS10 transposase mutants are blocked for target site interactions and promote formation of an excised transposon fragment. *Cell*, **59**, 385-394.
5. Guzman, L.M., Belin, D., Carson, M.J. and Beckwith, J. (1995) Tight regulation, modulation, and high-level expression by vectors containing the arabinose PBAD promoter. *Journal of Bacteriology*, **177**, 4121-4130.
6. Chun, K.T., Edenberg, H.J., Kelley, M.R. and Goebel, M.G. (1997) Rapid Amplification of Uncharacterized Transposon-tagged DNA Sequences from Genomic DNA. *Yeast*, **13**, 233-240.
7. Way, J.C., Davis, M.A., Morisato, D., Roberts, D.E. and Kleckner, N. (1984) New Tn10 derivatives for transposon mutagenesis and for construction of lacZ operon fusions by transposition. *Gene*, **32**, 369-379.
